# Supplementary material for: Numerical Investigation of Aerodynamic Performance of WindTurbine Airfoils with Ice Accretion
Source: Copernicus journal article supplement (doi:10.5194/wes-2021-3), 2021-02-01
Supplement: Supplementary file [file wes-2021-3-AC3-supplement.pdf]

# Numerical Investigation of Aerodynamic Performance of Wind Turbine Airfoils with Ice Accretion

Khaled Yassin<sup>1</sup>, Hassan Kassem<sup>2</sup>, Bernhard Stoevesandt<sup>2</sup>, Thomas Klemme<sup>3</sup>, and Joachim Peinke<sup>1</sup>

<sup>1</sup>ForWind-Centre for Wind Energy Research, Institute of Physics, University of Oldenburg, 26129, Oldenburg, Germany

<sup>2</sup>Fraunhofer Institute for Wind Energy Systems, Küpkersweg 70, 26129 Oldenburg, Germany

<sup>3</sup>Senvion GmbH, Überseering 10, 22297 Hamburg, Germany.

**Correspondence:** Khaled Yassin (khaled.yassin@uni-oldenburg.de)

**Abstract.** One of the emerging problems in modern computational fluid dynamics is the simulation of flow over rough surfaces, wind turbine blades with ice on its surface for instance. An alternative method to numerically simulate rough surfaces instead of using a grid with  $y^+ < 1$  criterion is to use rough wall functions (RWFs) that models the flow behavior in case of the presence of roughness. This work aims to investigate different rough wall function models to find out the model that can provide the most accurate results with the lowest computational resources possible. This aim was achieved by comparing coefficients of lift and pressure resulting from CFD simulations with wind tunnel results of an airfoil with actual ice profiles collected from the site. After implementing new RWFs in the OpenFOAM framework and validating the results with published experimental results, the comparison showed that momentum RWF provided the best agreement between simulation and experimental results while using only 25% of the number of cells used with smooth RWF. The conclusions of this work will be applied to simulate airflow fields of wind turbines with ice accretion.

*Copyright statement.* TEXT

## 1 Introduction

For the last few decades, energy generation from wind has increased rapidly as a renewable source of energy. Because of this rapidly increasing demand for wind energy, wind turbine manufacturers have been trying to increase the size of the turbine rotors. By increasing rotor diameter and tower height, the single turbine can now harvest more power from wind in almost the same horizontal area occupied by old, small size wind turbines. However, some of the best wind energy sites like in Europe and North America suffer from icing atmospheric conditions. These conditions can decrease the annual energy production by up to 40% as shown by Sailor et al. (2008). This drop in blade aerodynamic performance occurs due to several detachments and reattachment areas on the surface due to the presence of a rough ice surface.

Since the 1930s, different experiments were conducted in order to investigate the effect of roughness on fluid flow in general. One of the pioneers in this field was Nikuradse (1933) who investigated turbulent flow in pipes with different relative roughness values and Reynolds numbers between  $10^4$  to  $10^6$ . He noticed that the boundary layer follows the log-law as in the case of

smooth surface. However, in case of rough surface, there is a clear velocity shift ( $\Delta u$ ). A few years later, Schlichting (1937) studied the internal flow of a square-section channel with one rough wall. This rough wall had spherical segments, cones and angular shapes. He found that the velocity shift depends on four different geometrical parameters of roughness elements, namely: element's height, the area projected on the surface, area projected in flow direction and the average distance between elements. Accordingly, he derived an equation to calculate the friction coefficient on the plate surface. Later, Moody (1944) provided an engineering method to calculate friction losses in pipes due to roughness.

For external flow applications, Blanchard (1977) and Hosni et al. (1991) provided measurements of heat transfer performance of a heated flat plate with hemispherical roughness elements. Also, Hosni et al. (1993) studied the effect of roughness shape on the boundary layer. Achenbach (1977) studied heat transfer of a roughened circular cylinder at different roughness heights and Reynolds numbers.

From computational point of view, it is known that to correctly model the viscous sub-layer in computational fluid dynamics (CFD) methods, the height of the grid's first cell should fulfill the  $y^+ \leq 1$  criteria. Additionally, to avoid high aspect ratio cells, large number of cells over the surface should be generated. Accordingly, one method to simulate rough surfaces is to generate a fine grid that fits the rough surface. Wang and Zhu (2018) simulated ice accretion on the NREL Phase VI wind turbine blade. In their numerical setup, they used a grid  $y^+ \approx 1$ , which resulted in a grid with total of 7.3 million cells for a half-cylindrical domain for one blade. This gives a good idea about how much computational cost is needed to perform such simulations in the standard way. However, this cost can be much more increased for larger turbine blades manufactured nowadays.

Another approach is to modify the mathematical models in a way that the behaviour of flow over rough surfaces is grasped without the need for a fine grid. The growing use of CFD in fluid flow simulations in both research and industrial applications has caused an increased interest in this approach and more new models have been developed. The challenge is to find the proper mathematical models which are often based on the results of the aforementioned experiments. Chen and Patel (1988) introduced a two-layer model and a wall function in the  $k-\epsilon$  model to simulate rough surfaces. Hellsten and Laine (1997) provided an extension for the  $k-\omega$ -SST turbulence model to simulate the behaviour of flow, so did Wilcox et al. (2006) with the  $k-\omega$  model. Instead of providing changes to turbulence models, rough wall functions (RWFs) were developed to simulate the behaviour of turbulent flow near walls. In general, wall functions must provide adequate handling for flow change from its stream velocity to stagnation on the wall according to the no-slip condition. Thus RWFs should provide additional models that account for roughness. Recently, Da Silva et al. (2011) applied a new  $\nu_t$  wall function based on the work of Suga et al. (2006). Also, Knopp et al. (2009) and Chedeveigne and Aupoix (2017) provided  $k$  and  $\omega$  wall functions that are capable to adapt for the presence of roughness on the surface.

In our work here, we aim to find a computational model that is able to simulate the airflow around an iced wind turbine airfoil. This model should provide the most accurate results using the least computational resources possible. This aim is approached by comparing the CFD simulation results of different RWFs with experimental results of actual wind turbine ice accretion profiles. The studied ice profiles were collected from the site and tested in a wind tunnel after being molded and attached to the airfoil. In this work, three different RWFs were implemented in OpenFOAM® v6 (Greenshields (2017)) and compared: Knopp et al. (2009) RWF, which will be referred in this work as DLR-RWF, Da Silva et al. (2011) RWF, which will be referred as

Momentum-RWF, and Chedevergne and Aupoix (2017) RWF fitted to Colebrook's experimental results, which will be referred as Colebrook-RWF.

60 This article is structured as follows, Sec. 2 explains the mathematical model of each of the used RWFs. After that, Sec. 3 explains the preparation of the rough ice for the simulation and the corresponding computational mesh generation. Sec. 4 provides the results of each case studied in this work. The last section provides discussion and conclusions of this work and how these results can be applied to general rough surfaces simulations.

## 2 Mathematical Models

65 In this section, a brief description of the RANS models used in flow field simulations are introduced as a background for the studied RWFs. Subsequently, the details of the implemented RWFs are also explained given.

In RANS models, Navier-Stokes equations are solved as time-averaged while extra one equation is solved (like in Spalart-Allmaras) or two equations (like in  $k-\omega$  SST) or more equations are solved to close the system of equations required to solve the flow field (Versteeg and Malalasekera (2007)).

### 70 2.1 RANS turbulence models

In this work, only steady-state RANS turbulence models, namely Spalart-Allmaras (Spalart and Allmaras (1992)) and Menter  $k-\omega$  SST (Menter (1994)), were used to simulate the turbulent flow field over the iced airfoils. In general aerodynamic simulation problems, both models show good results, especially in the pre-stall AoA's. However, each model has its own advantages. Since Spalart-Allmaras (SA) turbulence model is a one-equation model, it is usually more stable and requires less computational  
75 power. On the hand,  $k-\omega$  SST can reach better results due to solving more turbulence parameters, but of course with more computational cost.

In this work, these two different turbulence models were specifically chosen to fit for different wall functions. As will be explained in the next section, one of the used RWFs defines a relationship for turbulent kinematic viscosity  $\nu_t$ . This type will be used only with SA model since it mainly solves  $\nu_t$  equation to simulate the flow field. The other two RWFs adapts  $k$  and  $\omega$   
80 values near the wall for the presence of roughness. Accordingly, these two RWFs will be used only with  $k-\omega$  SST turbulence model.

### 2.2 Rough wall functions

Nikuradse (1933) found that the boundary layer log-law behavior in flow over both rough and smooth surfaces are the same except for a velocity shift ( $\Delta u$ ). The difference between most of the proposed RWFs in various literature is how to calculate  
85 this shift. Schlichting (1937) worked out the parameters on which the velocity shift depends on, the four parameters: average elements height ( $K_{avg}$ ), the area projected on the surface ( $A_p$ ), area projected in flow direction ( $A_s$ ), and the average distance

between elements ( $L_{avg}$ ) (as shown in Fig. 1) are contracted together to one dimensionless parameter called equivalent sand roughness height ( $K_s$ ) that can be calculated by the equations presented in Dirling (1973)

$$\frac{K_s}{K_{avg}} = \begin{cases} 0.0164 \times \Lambda^{3.78} & \text{for } \Lambda < 4.93 \\ 139.0 \times \Lambda^{-1.90} & \text{for } \Lambda > 4.93 \end{cases} \quad (1)$$

90 where

$$\Lambda = \frac{L_{avg}}{K_{avg}} \left( \frac{A_p}{A_s} \right)^{-4/3} \quad (2)$$

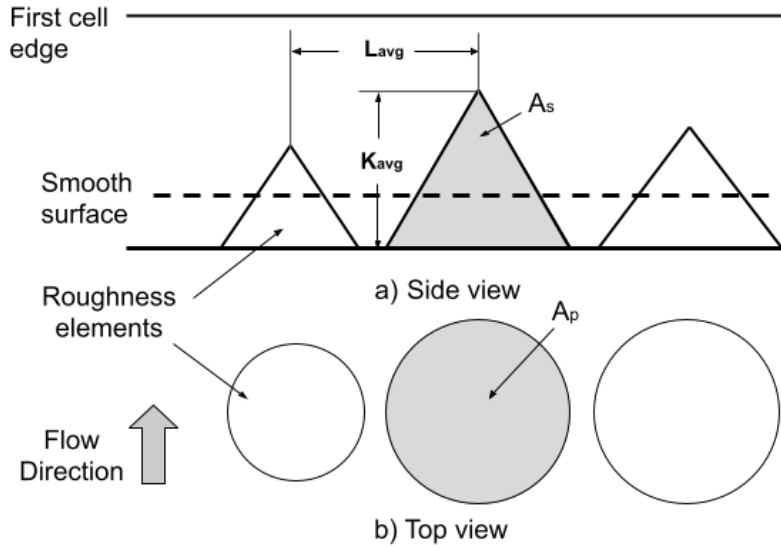

**Figure 1.** Roughness element geometrical parameters

So, once the roughness profile is known,  $K_{avg}$ ,  $L_{avg}$ , and  $D_{avg}$  can be calculated. Assuming roughness elements take certain geometrical shape for approximation,  $A_p$  and  $A_s$  can be calculated. In the current study, roughness elements are assumed to take conical shapes. Accordingly,  $A_p/A_s = \pi D_{avg}/2K_{avg}$  and Equations 1 and 2 can be implemented to calculate  $K_s$ . The final value of the velocity shift in all RWFs used in this work depends on the calculated value of  $K_s$ .

### 2.2.1 Momentum RWF

Da Silva et al. (2011) applied the velocity shift to the well-known log-law equation by introducing a new term, namely  $\Delta B$ , that represents this velocity shift as a function of  $K_s$  according to Cebeci (2004) ideas in the equations

$$u^+ = \frac{1}{\kappa} \ln(Ey^+ - \Delta B) \quad (3)$$

$$\Delta B = \begin{cases} 0 & : K_s^+ \leq 2.5 \\ \frac{1}{\kappa} \ln \left[ \frac{K_s^+ - 2.25}{87.75} + C_s K_s^+ \right] \sin [0.4258(\ln K_s^+ - 0.811)] & : 2.5 < K_s^+ < 90 \\ \frac{1}{\kappa} \ln(1 + C_s K_s^+) & : K_s^+ \geq 90 \end{cases} \quad (4)$$

Where  $y^+ = y(1)u_\tau/\nu$ ,  $K_s^+ = u_\tau K_s/\nu$ ,  $E = 9.8$ ,  $\kappa = 0.41$  and

$$C_s = \frac{E}{32.6} - \frac{1}{K_s^+} \quad (5)$$

Finally, turbulent viscosity can be calculated by:

$$105 \quad \nu_t|_w = \nu \left( \frac{y^+ \kappa}{\ln(Ey^+ / e^{\kappa \Delta B})} \right). \quad (6)$$

Since this wall RWF deals mainly with  $\nu_t$ , it is used with Spalart-Allmaras turbulence model to simulate rough surface.

## 2.2.2 DLR RWF

In their work, Knopp et al. (2009) followed the ideas of Aupoix and Spalart (2003) in adding the velocity shift effect to the wall function. However, instead of applying the shift on turbulent viscosity as in Aupoix and Spalart (2003), they used their  
110 procedure to adapt  $k$  and  $\omega$  turbulence parameters. The new  $k$  and  $\omega$  RWF states that

$$\omega|_w = \min\left(\frac{u_\tau}{\beta_k^{1/2} \kappa \tilde{d}_o}, \frac{60\nu}{\beta_\omega y(1)^2}\right) \quad (7)$$

$$\tilde{d}_o = 0.033 \phi_{r_2} k_s \quad (8)$$

$$\phi_{r_2} = \min\left(1, \frac{k_s^{+2/3}}{30}\right) \min\left(1, \frac{k_s^{+1/4}}{45}\right) \min\left(1, \frac{k_s^{+1/4}}{60}\right) \quad (9)$$

$$k|_w = \phi_{r_2} k_{rough} \quad (10)$$

$$115 \quad k_{rough} = \frac{u_\tau}{\beta_k^{0.5}}, \phi_{r_2} = \min\left(1, \frac{k_s^+}{90}\right) \quad (11)$$

Where  $\beta_k = 0.09$ ,  $\kappa = 0.41$ ,  $\beta_\omega = 0.075$ . Unlike Momentum RWF explained in section 2.2.1, this RWF deals with modifying  $k$  and  $\omega$  values near the wall. Hence, this RWF is used with  $k$ - $\omega$  SST turbulence model.

## 2.2.3 Colebrook RWF

Chedevergne and Aupoix (2017) applied Suga et al. (2006) approach in adapting  $k$  and  $\omega$  turbulence parameters to rough  
120 surfaces and fitted the resulting formula to Colebrook's experimental data. This resulted in:

$$k|_w = \max\left(0, \frac{1}{\sqrt{\beta^*}} \tanh\left[\left(\frac{\ln \frac{k_s^+}{90}}{\ln 10} + 1 - \tanh \frac{k_s^+}{125}\right) \tanh \frac{k_s^+}{125}\right]\right) \quad (12)$$

$$\omega|_w = \left( \frac{300}{k_s^+} \left( \tanh \frac{15}{4k_s^+} \right)^{-1} + \frac{191}{k_s^+} \left[ 1 - \exp\left( -\frac{k_s^+}{250} \right) \right] \right) \quad (13)$$

Also the same like DLR RWF, this one is used with k- $\omega$  SST turbulence model.

### 3 Profiles and grids of CFD simulations

125 To enable the usage of the aforementioned RWF's, rough ice profiles have to be smoothed to give an equivalent smooth surface. By using this smooth surface and the  $K_s$  value calculated from Equ. 1, the RWF's can be used in the simulation cases. This section explains how these profiles should be prepared and how the computational grid should be generated.

#### 3.1 Wind turbine airfoil with ice accretion

To investigate the different wall functions described in Sec. 2, they were applied on a wind turbine airfoil with two different  
130 ice accretion profiles. The two ice profiles were collected from site, scanned and then machined as a leading edge attachment for wind tunnel measurements.

Both ice profiles take the horn-ice form Fig. 2 which usually occur under severe icing conditions and also both of them extend to 7.5-10 % of chord length. However, it can be noticed that profile 1 is smoother than profile 2. Also it can be noticed that profile 1 takes a more aerodynamic shape than profile 2 since profile 2 has two horns which forms a stagnation area between them.

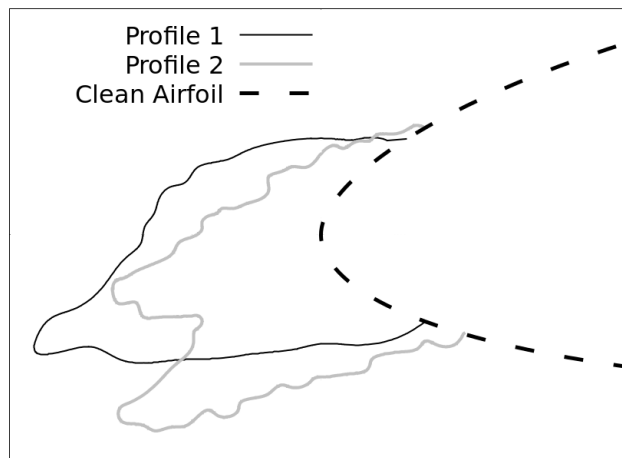

**Figure 2.** Ice profiles 1 and 2

135

### 3.2 Roughness parameters calculations

Since all RWFs treat the rough wall as smooth wall with a velocity shift as explained in Sec. 2.2, the actual rough surface of the ice profile is replaced with another equivalent smooth surface. The new smooth surface will be used to generate the computational grid around the profile and will be numerically treated as rough surface, i.e. a velocity shift will be added to the smoothed surface. To calculate this new surface, the rough surface was smoothed with cubic splines and . Similar to the calculation procedures of roughness parameters indicated in the DIN-EN-ISO 4287 standard (DIN (2010)), the rough surface should be smoothed as shown in Fig. 3a, using a cubic spline in this work, to find an average, smooth surface. After that, this smooth surface could be mapped to the x-axis as shown in Fig. 3b to be able to analyze the roughness parameters.

Knowing the distance between roughness elements and height of elements, average sand roughness height explained in Fig.1 can be calculated using Eq. (1). By analyzing the laser scanned ice surfaces in different literature like Hawkins et al. (2017) and McClain et al. (2018), it can be assumed that roughness elements take conical shapes. Accordingly,  $A_p = \pi D_{avg}^2/4$  and  $A_s = 0.5K_{avg}D_{avg}$ . The above analysis gives results in  $K_s = 1 \times 10^{-3}m$  and  $1 \times 10^{-2}m$  for profiles 1 and 2 respectively.

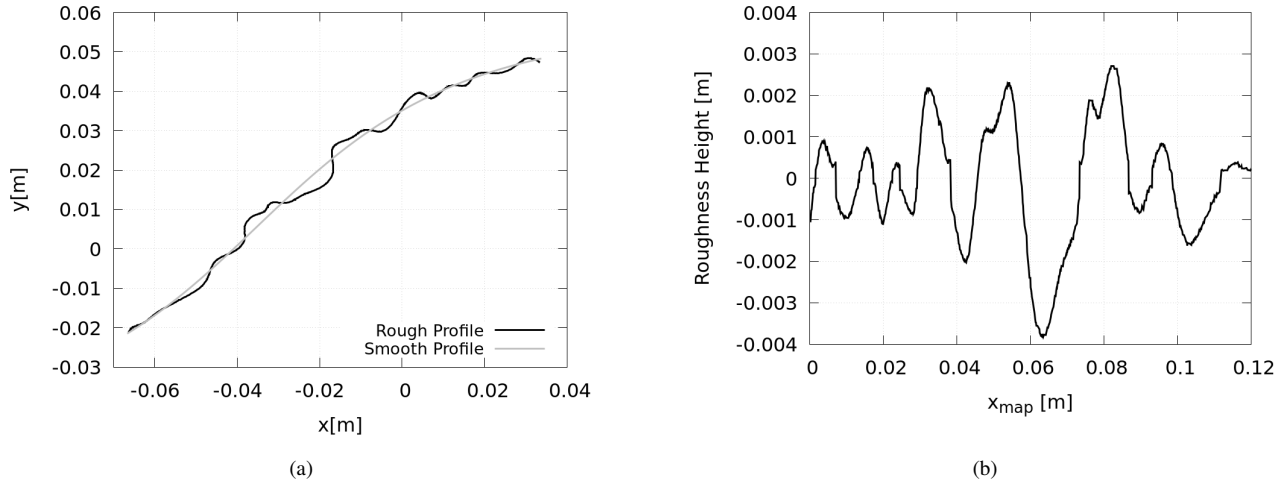

**Figure 3.** An example of: (a) smoothing a rough surface using cubic spline and (b) mapping roughness to x-axis

### 3.3 Grid generation

In order to use rough wall functions, the height of the first cell center should be large enough to cover the roughness element. Along with converting the rough surface into a smoother one, the resulting grid is much coarser than the grid required by smooth wall functions which require  $y^+(1) < 1$  to be able to correctly simulate the boundary layer. Accordingly, the studied approach in this work requires less computational resources. In case of the two ice profiles studied in this work, to properly generate a grid that fulfills the condition of  $y^+(1) < 1$ , is found to require number of cells  $\approx 4 \times 10^5$  cells in 2D simulations. On the other hand, when using rough wall functions with the proper first cell height and roughness smoothing, it is found to

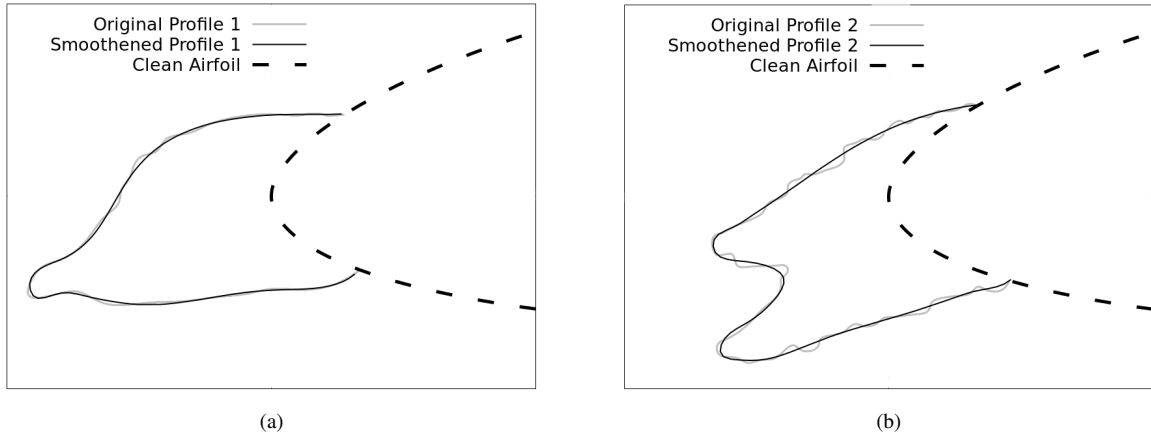

**Figure 4.** Comparison between original and smoothed ice surfaces for: (a) profile 1 and (b) profile 2

155 require less than  $1 \times 10^5$  cells in 2D simulations. A comparison between smooth and rough wall function grids is shown in figures 4 and 5. Resulting from the numerical setup described above, properties of computational grids used in this work are given in Tab.1.

To provide a comparison between the results of fully resolved surface roughness and using RWFs, the next section will also provide a comparison between  $C_l$  values resulted from using fine and coarse grids, shown in figures 5a and 6a respectively, and coarse grids, shown in figures 5b and 6b, used with RWFs.

160 It should be noticed that the first cell height in case of RWF simulations is relatively larger that in case of fully resolved mesh to fit the criteria explained by Liu (2014). This criteria mandates that the height of the cell center of the first cell near the wall should be larger than the roughness height. Accordingly, a mesh independence test was done to select the first cell height values indicated in Tab 1.

165

**Table 1.** Simulation cases and its grids

| Case No. | Profile   | Re                | AoA [°]                  | y(1) [m]              |                     | No. of Cells      |                   |
|----------|-----------|-------------------|--------------------------|-----------------------|---------------------|-------------------|-------------------|
|          |           |                   |                          | Resolved              | RWF                 | Resolved          | RWF               |
| 1        | profile 1 | $2.6 \times 10^6$ | $-4^\circ$ to $16^\circ$ | $1.57 \times 10^{-5}$ | $9 \times 10^{-3}$  | $4.1 \times 10^5$ | $7.9 \times 10^4$ |
| 2        | profile 1 | $5.2 \times 10^6$ | $0^\circ$ to $16^\circ$  | $1.22 \times 10^{-6}$ | $9 \times 10^{-3}$  | $4.6 \times 10^5$ | $7.9 \times 10^4$ |
| 3        | profile 2 | $3.1 \times 10^6$ | $-4^\circ$ to $16^\circ$ | $1.56 \times 10^{-5}$ | $10 \times 10^{-3}$ | $4.1 \times 10^5$ | $6.3 \times 10^4$ |



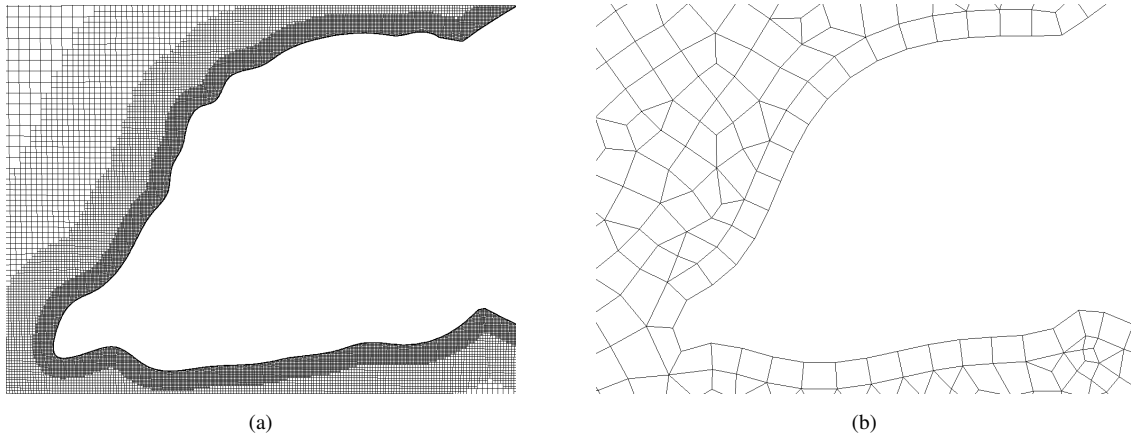

**Figure 5.** Comparison between: (a) fine (with fully resolved roughness) and (b) coarse (with RWFs) grids of profile 1

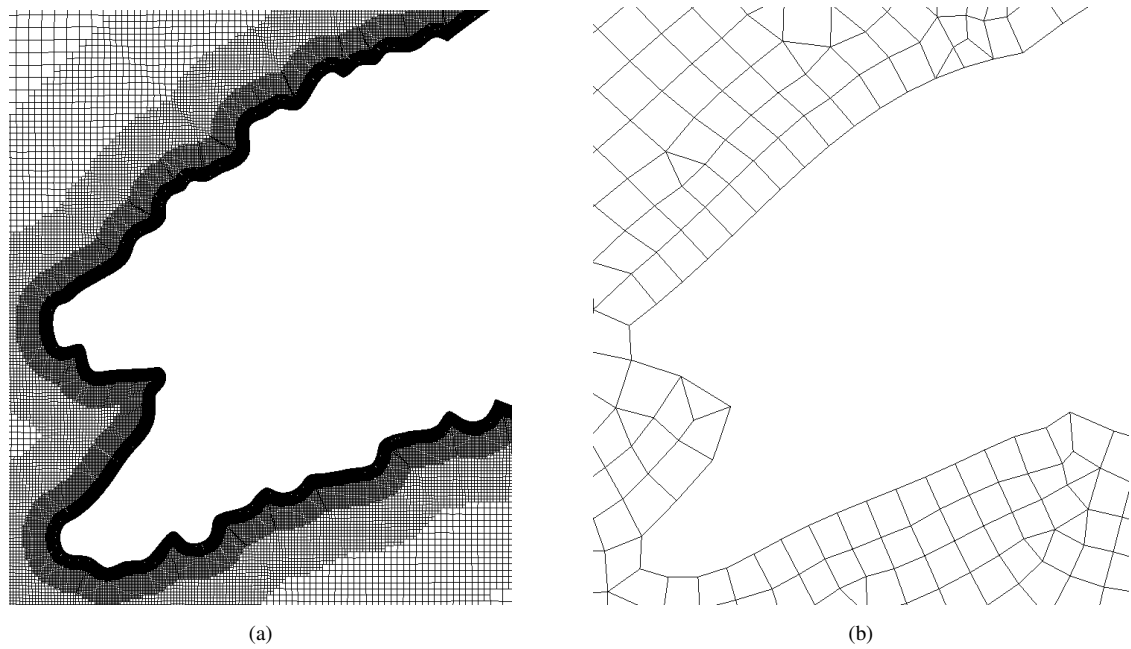

**Figure 6.** Comparison between: (a) fine (with fully resolved roughness) and (b) coarse (with RWFs) grids of profile 2

## 4 Simulation results

For simulation results, validation case will be introduced to give evidence of correct implementation of the new codes. Then, the results of the simulation cases shown in Tab.1 will be shown.

### 4.1 Implementation and validation

170 To apply the aforementioned RWF, equations 7-13 were implemented within OpenFOAM framework. The Momentum RWF is already available in OpenFOAM (named nutURoughWallFunction). However, the other two wall functions, namely DLR and Colebrook RWF, are not available. These two wall functions were implemented and validated against experimental results published by Achenbach (1977). In this paper, the author analyzed the flow field around a circular copper cylinder with pyramidal roughness elements to study both fluid flow and heat transfer. This experiment was done on a 0.5 m length, 0.15 m diameter  
175 copper cylinder at different roughness heights and Reynolds numbers.

It is known that RANS simulations of flow filed around a cylinder is already unstable and hard to predict, especially when it comes to the prediction of separation location. However, this case was selected to identify any false implementation of RWFs in OpenFOAM that may lead to unstable numerical solution. Figures 7-a, b and c shows the results of simulating circular cylinder at  $Re = 4 \times 10^6$  and  $K_s = 75 \times 10^{-5}$  m,  $3 \times 10^{-3}$  m,  $9 \times 10^{-3}$  m, and smooth cylinder surface respectively. Despite  
180 the experiments were carried out at different  $Re$  numbers, this work only considered the comparison with  $Re = 4 \times 10^6$  since this value is in the same order of magnitude of the wind tunnel results of iced airfoils that will be shown in the next sections. Also, this work didn't take into consideration the heat transfer results of Achenbach. The main focus was the fluid flow only. As shown in figures 7-a, b and c, all on the three RWFs managed to predict  $C_p$  of this case correctly between  $0^\circ$  and  $60^\circ$  of the cylinder surface. For angles higher than  $60^\circ$ , each RWF had different behavior. For the Momentum RWF, a good agree-  
185 ment between numerical and experimental results can be predicted up to  $100^\circ$  where the model fails to correctly simulate the separation location. On the other hand, both DLR and Colebrook RWFs underestimate the value of  $C_p$  and overestimate the separation location over the cylinder.

Figures 7-a, b and c also show the results of simulation of smooth, resolved cylinder simulation using Spalart-Allmaras Turbulence model. In comparison with Momentum RWF simulations, it can be noticed that the RWF caused earlier prediction of the  
190 location of separation. This matches with the fact that the rough surface prevents transition from laminar to turbulent flow and initiates separation earlier.

While analyzing the results of these validation cases, one must keep in mind that such a complicated simulation case of flow over a cylinder at high Reynolds number using steady-state RANS simulation is difficult. Accordingly, one should not expect good agreement between numerical and experimental simulation on all locations over the cylinder. These low expectations  
195 comes from the fact that all RANS models fail to accurately predict the flow separation location even for airfoils with relatively high AoA. For cylinder case, the situation is even harder. Since the aim of this validation process is to make sure that the RWFs have been correctly implemented and are working properly and not to judge the mathematical behavior of these RWFs, it can be concluded that the RWFs follows the trend of  $C_p$  distribution over the cylinder.

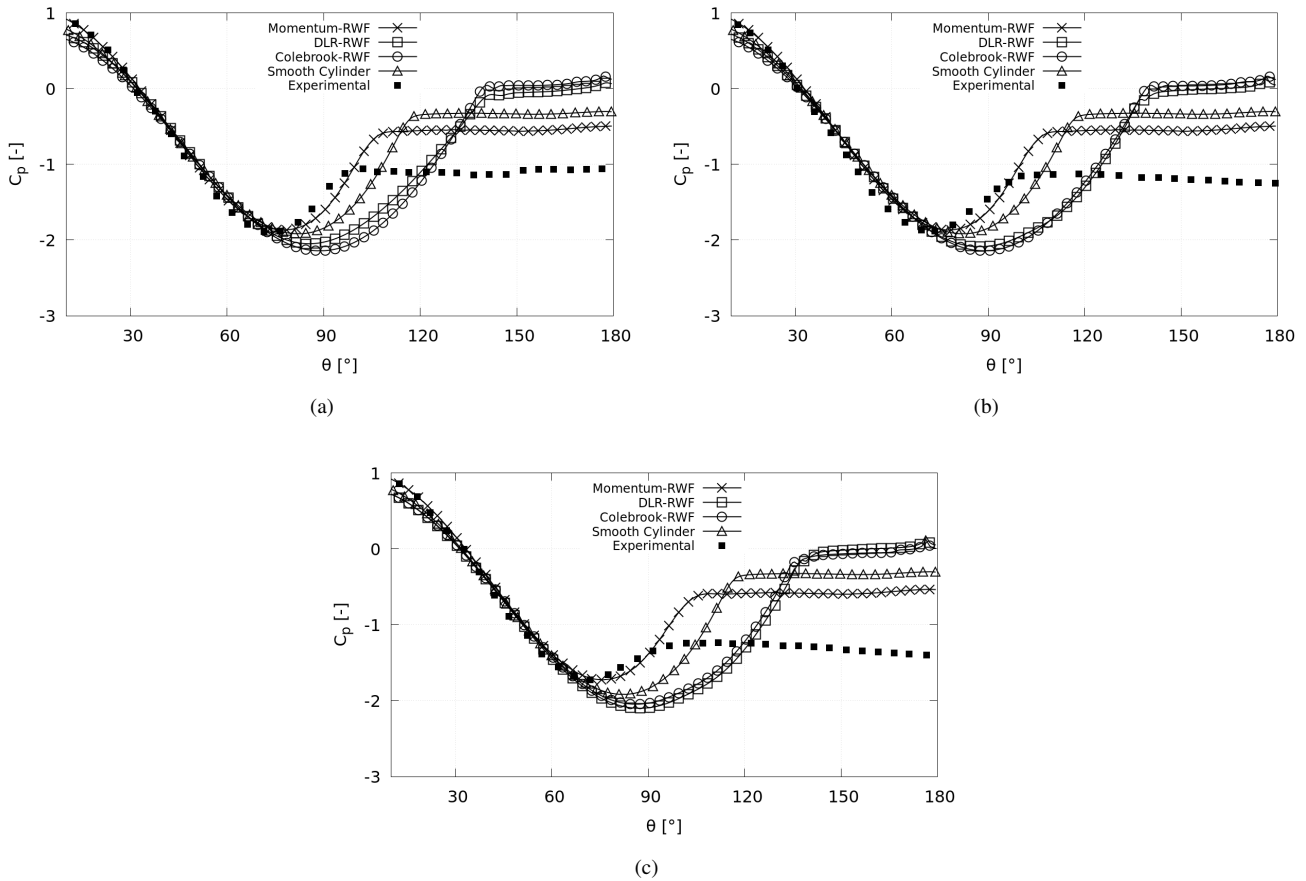

**Figure 7.**  $C_p$  distribution over rough cylinders using implemented wall functions at  $Re = 4 \times 10^6$  and: (a)  $K_s = 75 \times 10^{-5}$  m, (b)  $K_s = 3 \times 10^{-3}$  m, (c)  $K_s = 9 \times 10^{-3}$  m where  $\theta = 0^\circ$  at stagnation point and increases downstream.

#### 4.2 Case 1: profile 1 at $Re = 2.6 \times 10^6$ :

200 In this case, profile 1 was tested at  $Re = 2.6 \times 10^6$ , which is a relatively low Reynolds number compared to the other two cases. Fig.8 shows the comparison between the predictions of each of the three RWFs with wind tunnel results. On the other hand, figures 9a-9d gives an deeper look at the prediction of pressure distribution on the surface of the profile and compare the results with pressure-tap measurement values.

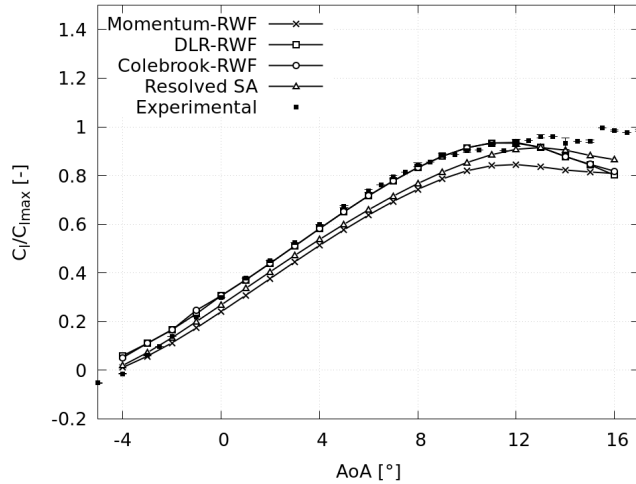

**Figure 8.** Case 1:  $C_l$  vs AoA for different wall functions

205 It can be noticed from Fig.8, and also expected, that each model has a different prediction for the maximum lift coefficient  $C_{l_{max}}$  value or the angle of attack (AoA) at which this  $C_{l_{max}}$  occurs. However, Momentum-RWF showed the best agreement with  $C_l$  values. On the other hand, the pressure coefficient ( $C_p$ ) shows different behaviors depending on the angle of attack. Figures 9a-9d show that the  $C_p$  distribution at AoA = 0°, 4°, 8°, and 12° respectively. At AoA = 0°, a good agreement between experimental and CFD results can be seen except for the lower surface region at  $x/c \approx -0.05$  to 0.05. At AoA's = 4°  
 210 and 8°, good agreement was achieved over both smooth and rough surfaces of the airfoil. This agreement starts to suffer from some deviations at AoA = 12°. These deviations are expected due to relatively high AoA that is higher than the AoA of max  $C_l$ .

### 4.3 Case 2: profile 1 at $Re = 5.1 \times 10^6$ :

This case is exactly like the previous case except for being tested at  $Re = 5.1 \times 10^6$ . This high Reynolds number is challenging  
 215 for RWFs since it leads to more violent separation and hence are harder to be predicted.

This case shows good agreement (Fig.10) especially in the linear region of AoA vs  $C_l$  relationship. However, the over prediction of  $C_{l_{max}}$  can be noticed in DLR and Colebrook RWFs results.

The effect of the high Reynolds number can be seen in  $C_p$  distribution curves (figures 11a-11d) where large differences between DLR RWF predictions and experimental results occurs for AoA = 0° and 4°. Also Colebrook RWF shows under estimation of  
 220 pressure on the upper surface of the airfoil at AoA = 4°. While the Momentum RWF shows better agreement for all studied AoA's.

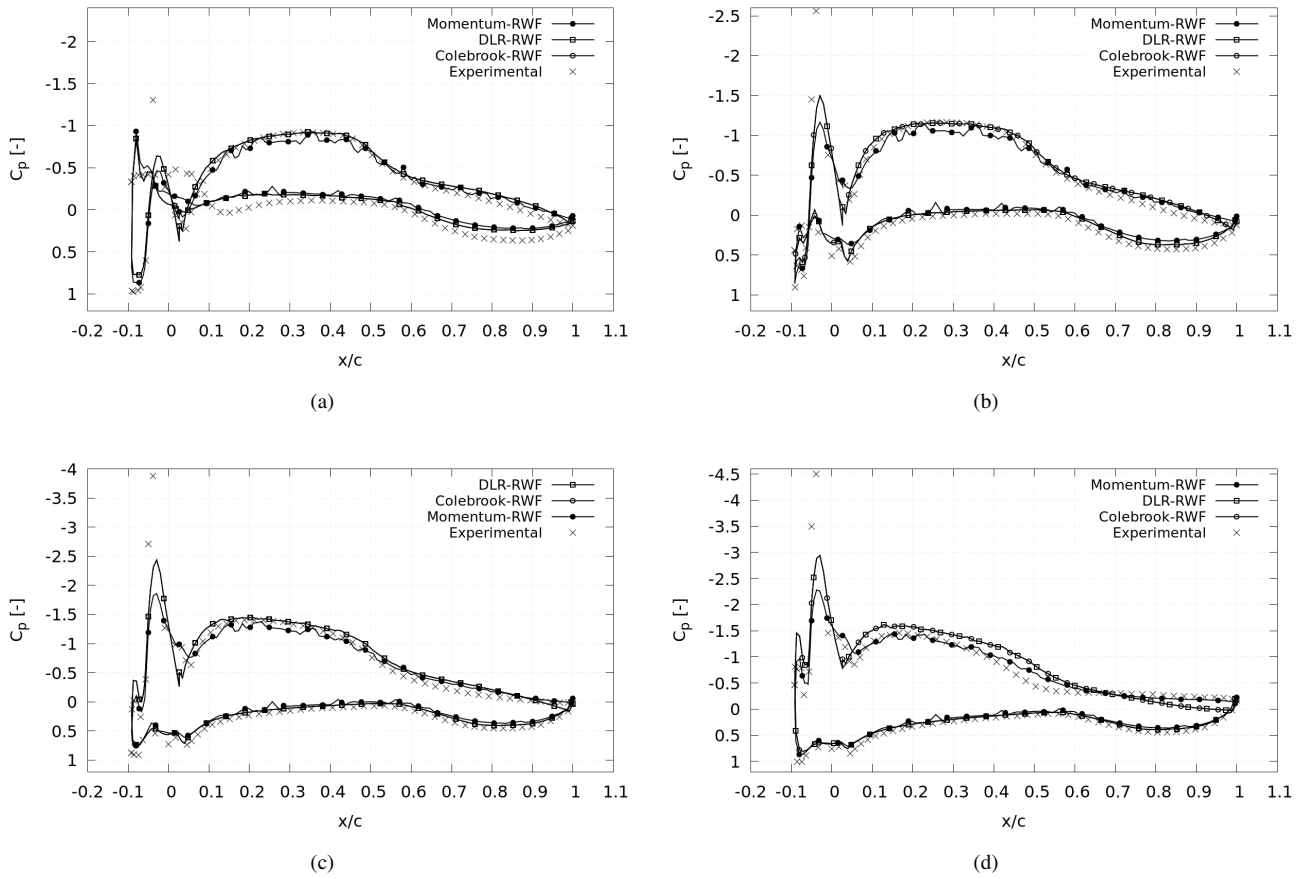

**Figure 9.** Case 1:  $C_p$  distribution for  $AoA =$  (a)  $0^\circ$ , (b)  $4^\circ$ , (c)  $8^\circ$ , and (d)  $12^\circ$

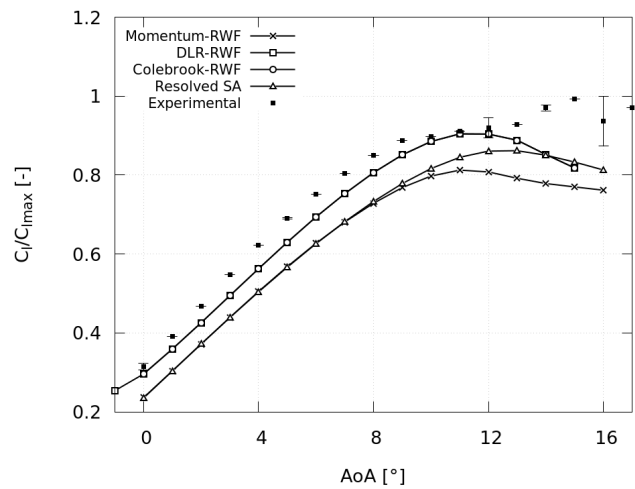

**Figure 10.** Case 2:  $C_l$  vs  $AoA$  for different wall functions

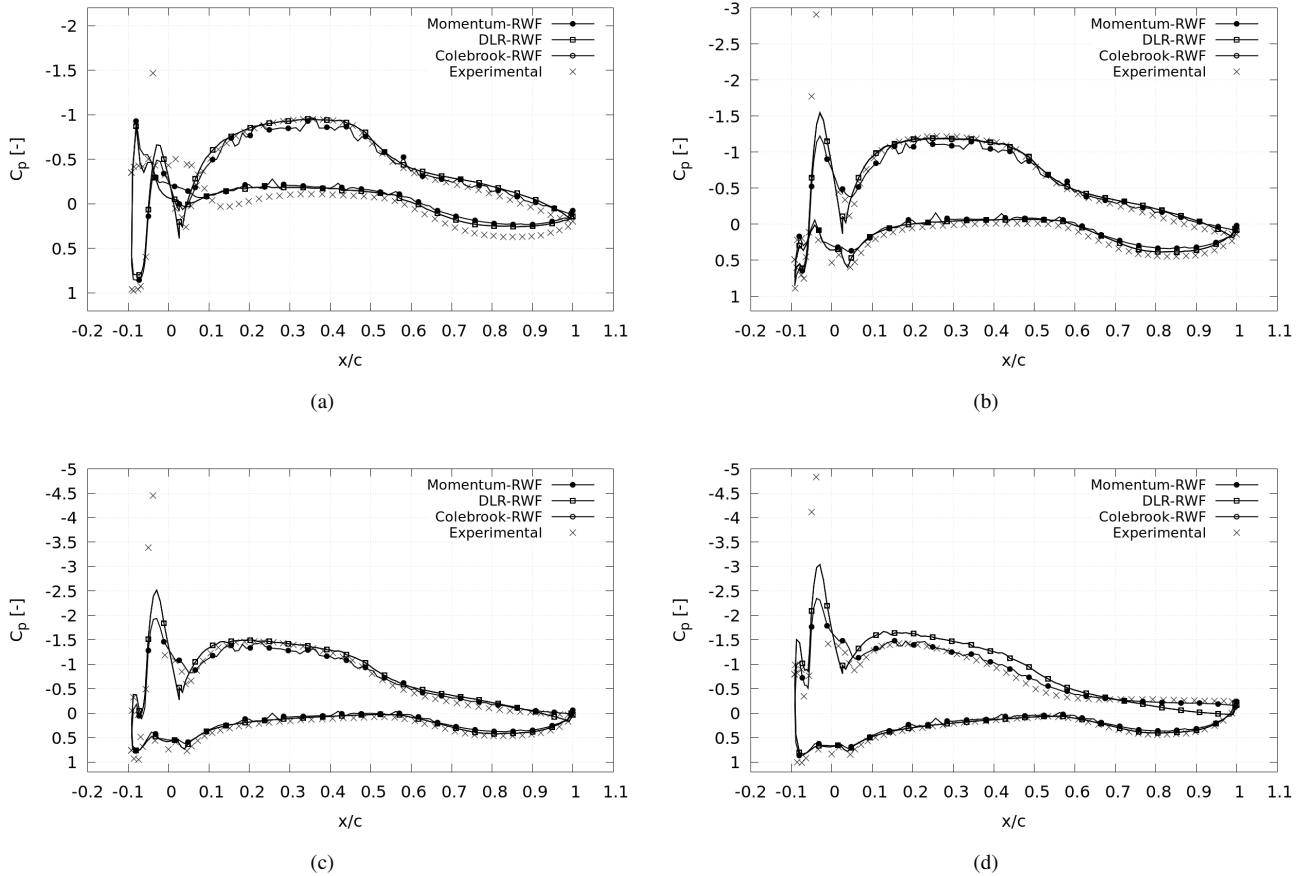

**Figure 11.** Case 2:  $C_p$  distribution for AoA = (a)  $0^\circ$ , (b)  $4^\circ$ , (c)  $8^\circ$ , and (d)  $12^\circ$

#### 4.4 Case 3: profile 2 at $Re = 3.1 \times 10^6$ :

In this case, the flow over profile 2 was simulated. It can be noticed from Fig.2 that profile 2 has not only two ice horns, but also it has a rougher surface, i.e. has a higher  $K_s$  value. The effect of this complex shape can be obviously seen Fig. 12. It can be noticed from this figure that the  $C_l$  curve does not show a clear stall AoA. Only the slope of the  $C_l$  curve decreases starting from AoA =  $5^\circ$ .

Fig.12 also shows that all compared models had good agreement with experimental results for AoA's in range between  $-1^\circ$  and  $5^\circ$ . Out of this range, each model shows different behavior. For Colebrook and Momentum RWFs shows large deviations from experimental results for AoA's higher than  $5^\circ$  while DLR RWF shows better agreement in this range. For  $C_p$  distribution, Fig.13a shows good agreement between experiment and all simulations at AoA =  $0^\circ$  on the upper surface of the airfoil while they have higher deviations from experiment on the lower surface in the  $x/c$  range between -0.1 to 0.4. At AoA =  $4^\circ$  results

shown in Fig.13b, Colebrook and DLR RWFs shows large deviations over the whole airfoil while Momentum RWF shows better agreement. In figures 13c and 13d good agreement between all models and experimental results can be noticed.

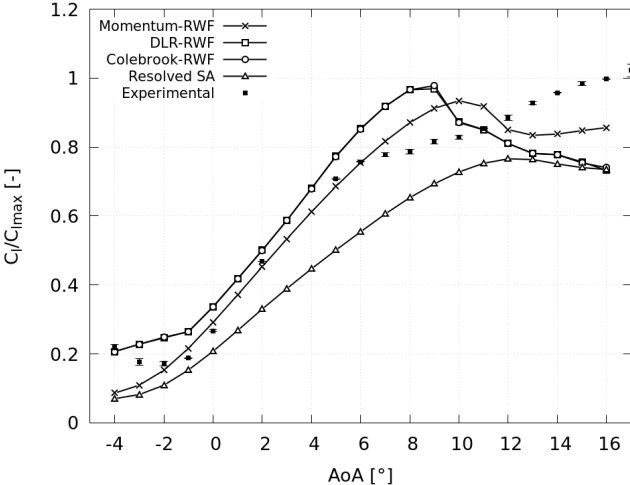

Figure 12. Case 3:  $C_l$  vs AoA for different wall functions

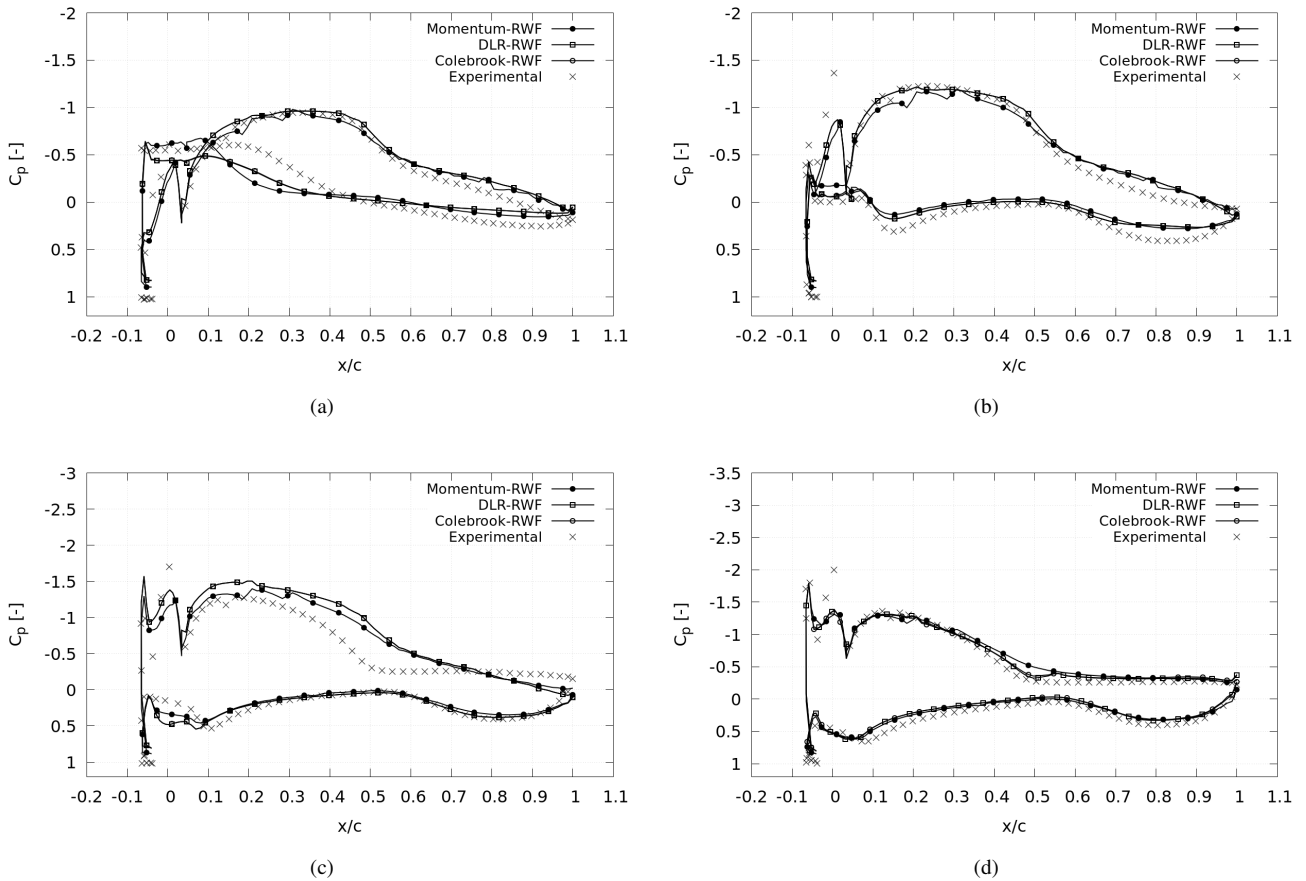

**Figure 13.** Case 3:  $C_p$  distribution for AoA = (a)  $0^\circ$ , (b)  $4^\circ$ , (c)  $8^\circ$ , and (d)  $12^\circ$

#### 235 4.5 Agreement analysis

The results shown in the last sections show that the flow field has different behaviors with using each RWFs. To find out which of the three RWFs resulted in the most accurate results, error analysis should be done to find out which RWF had less deviation from the experimental results.  $C_p$  distribution was chosen as the main criteria to compare since as explained earlier, the  $C_p$  distribution gives a better understanding of the shape of the flow field over the body which is very important to simulate ice accumulation. In this work, the average absolute error between  $C_p$  calculated from pressure measurements in wind tunnel and the corresponding  $C_p$  calculated from simulations using the The standard error of estimates:

$$\sigma_{avg} = \sqrt{\frac{\sum_1^N (C_{p,exp} - C_{p,sim})^2}{N}} \quad (14)$$

where  $\sigma_{avg}$  is the standard error,  $C_{p,exp}$  and  $C_{p,sim}$  are coefficients of pressure of experiments and simulations respectively, and N is the number of experimental points.

245 As shown in the Figures 14a and 14b, it can be noticed that the higher the AoA value, the more error between simulation and



wind tunnel results except for some results at  $AoA = 4^\circ$  in case 1. While in Fig. 14a, we can see that the error values are not increasing with the increase of  $AoA$  in the same rates as shown in the previous two figures. These error results shows that all RWFs has a limited capabilities in simulating the detachment of the flow and accordingly give results deviated from actual results. Also, in case 3, where profile 2 was simulated, the flow should be highly unsteady which is not suitable for RANS simulations. However, the Momentum RWF managed to predict the  $C_p$  distribution better than the other models except for  $AoA = 4^\circ$ .

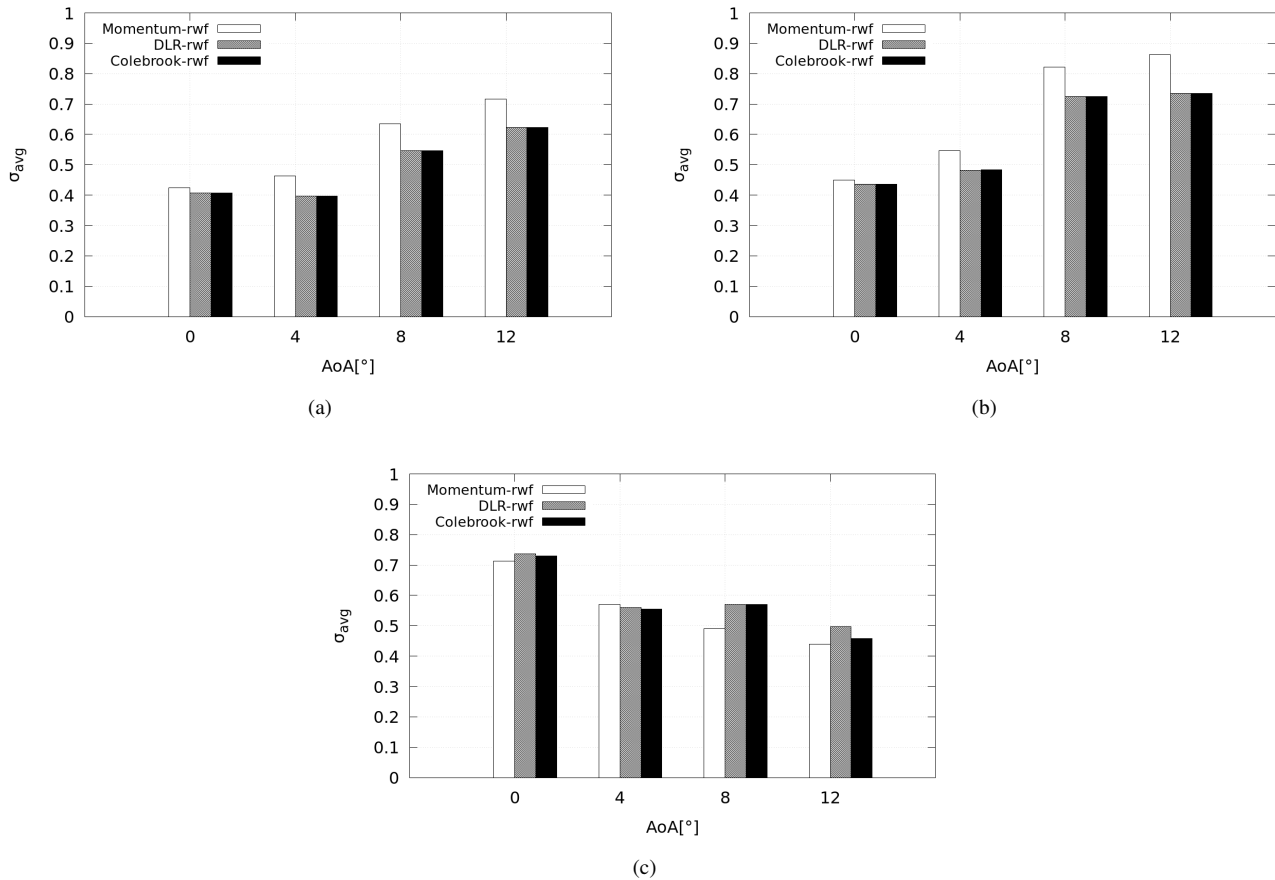

**Figure 14.** Average error between experimental and simulation results of  $C_p$  distribution (a) case 1, (b) case 2, and (c) case 3

## 5 Discussion and conclusions:

In this work, three different rough wall functions were tested on iced wind turbine airfoils. The aim of this comparison was to find out which RWF will be the most suitable one to simulate ice accretion on wind turbine blades exposed to icing atmospheric conditions. To be able to apply these RWFs, DLR and Colebrook RWFs were implemented to OpenFOAM v6 CFD framework along with the existing Momentum RWF. After that, two ice profiles that collected from wind site, molded to airfoil, and

tested in the wind tunnel were smoothed by a cubic spline to find the equivalent smooth surface. Also, roughness parameters described in Sec. 3.2 were calculated and used to calculate the velocity shift value  $\Delta u$ .

In this section, general remarks and discussions of the results are introduced. Then the conclusions from the outcomes of this work will be highlighted.

## 5.1 General remarks and discussion

Regarding the rough ice surface shown in Fig. 2, one should keep in mind that the ice formation process (or roughness formation in general) is a stochastic phenomenon. Which means, if the same airfoil exposed to the same atmospheric conditions, the ice profile resulting will not be exactly the same. Hence, to find the real smooth surface required for the simulations, a large number of ice profiles of the same atmospheric conditions should be studied and averaged to find the real average surface. Also, each rough surface will give different attachment and reattachment bubbles locations, and might have different overall pressure distribution. However, the scope of this work is only to prove that the RWF approach results in good results compared to experiments.

Fig. 15 shows the LIC of flow in cases 2 and 3 at  $\text{AoA} = 0^\circ$  in fully resolved grid case only. In case of coarse grids, such separation bubbles will not be clearly visible since the RWFs compensate these effects with a mathematical model affecting on the different turbulence parameters. From the geometry of the two ice profiles shown in Fig.2, it can be noticed that both profiles are slightly inclined downwards. This inclination forms a relatively big separation bubble behind the profile on the lower surface as shown in Fig. 15. That is why we can see deviations between simulations and experimental results of  $C_p$  distribution in this region (i.e. the lower surface between  $x/c = -0.1$  to  $0.1$ ) in most of the studied cases.

It can be noticed from the results that agreement of  $C_l$  curves between simulations and experimental results doesn't necessarily mean that flow field was accurately simulated. For example, in case 3, DLR RWF shows better  $C_l$  agreement than other models at  $\text{AoA} = 4^\circ$  while from  $C_p$  distribution, DLR RWF showed larger deviations from experimental results. The same happened with case 2 at  $\text{AoA} = 0^\circ$  and  $4^\circ$ . The overall  $C_l$  at these AoAs in the end had good agreement because the deviations on the upper and lower surfaces compensate each other which can be misleading in this case. To accurately access the  $C_l$ , it should be studied together with the  $C_p$  distribution curves.

It is noteworthy that all the RWFs used are only algebraic equations that express the behavior of the flow near that wall. Accordingly, the three different RWFs have the same computational cost. However, the overall computational cost depends only on number of cells in the used computational grid and the turbulence model itself as discussed in Sec. 2.

## 5.2 Conclusions

The simulation cases shows that DLR RWF provides the best agreement of cases 1 and 2 simulations with experiments compared to the other models. While in case 3, Momentum RWF provides the least errors between experiments and simulations. In some cases, the simulations show fair agreement at locations that witness violent separation like concave areas between ice and airfoil. This fair agreement is expected due to using steady state RANS simulations.

From this work, we can conclude that in simulations of rough, iced airfoil profiles, the Momentum RWF should be used to

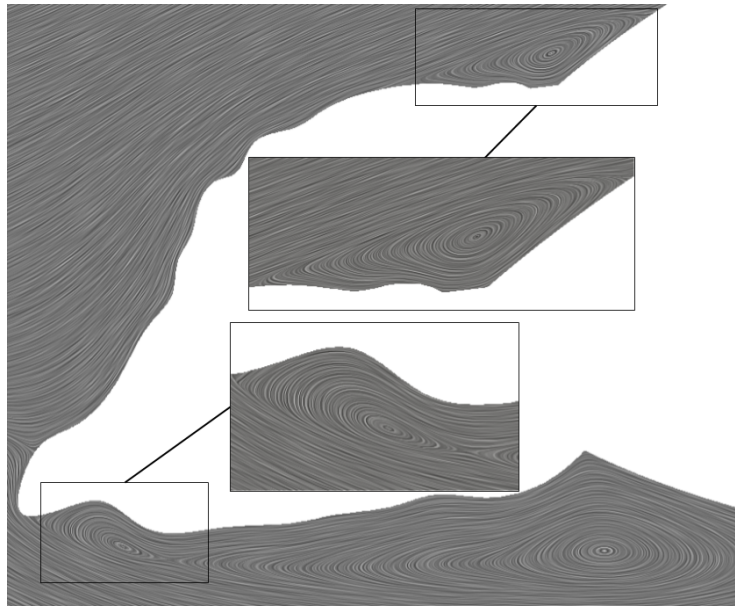

(a)

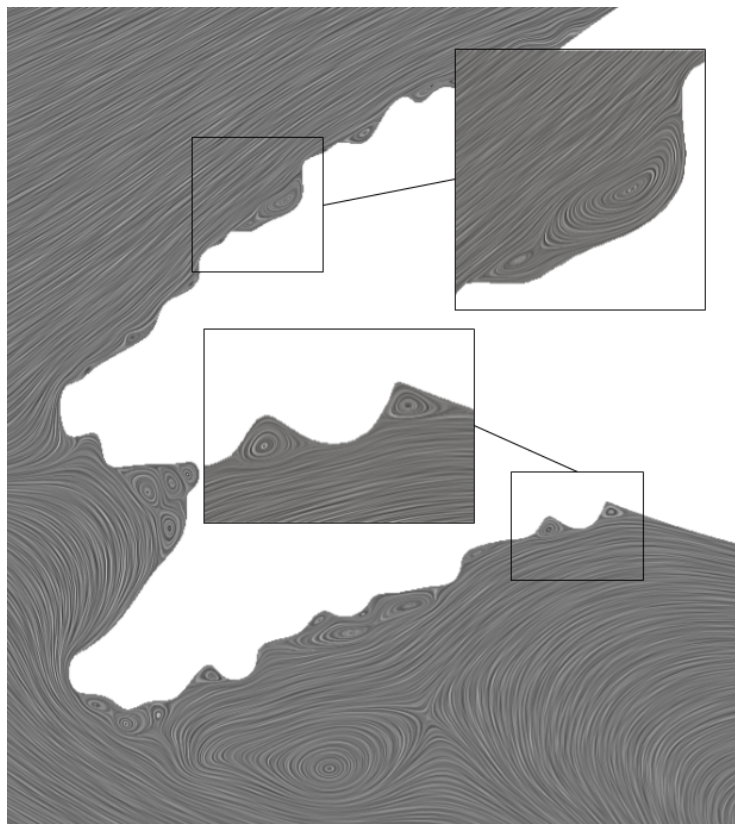

(b)

**Figure 15.** LIC of flow in (a) case 2 at  $AoA = 0^\circ$  (b) case 3 at  $AoA = 0^\circ$  with zoom-in on some local separation locations

290 simulate the effect of the presence of roughness on the overall aerodynamic performance. Such method should be beneficial for the simulation of the performance drop of wind turbine blades exposed to icing atmospheric conditions with minimum computational effort.

## Appendix A: Nomenclature

|               |                                               |                                    |                                 |
|---------------|-----------------------------------------------|------------------------------------|---------------------------------|
| $A_p$         | Area projected normal to streamwise direction | <b>Abbreviations</b>               |                                 |
| $A_s$         | Area projected to streamwise direction        | RWF                                | Rough wall function             |
| $\Delta B$    | Log-law velocity shift                        | RANS                               | Reynolds-averaged Navier-Stokes |
| $C_l$         | Coefficient of Lift                           | <b>Greek letters</b>               |                                 |
| $C_{l_{max}}$ | Max lift coefficient                          | $\kappa$                           | von Karman constant             |
| $C_p$         | Coefficient of pressure                       | $\omega$                           | Specific rate of dissipation    |
| $D$           | Roughness element diameter                    | $\nu$                              | Eddy viscosity                  |
| $k$           | Turbulent kinetic energy                      | <b>Subscripts and superscripts</b> |                                 |
| $K$           | Element Roughness Height                      | <i>avg</i>                         | average value                   |
| $K_s$         | Equivalent Sand Roughness Height              | <i>exp</i>                         | experimental result             |
| $L$           | Distance between two roughness elements       | <i>sim</i>                         | simulation result               |
| $u_\tau$      | Friction velocity                             | <i>w</i>                           | wall value                      |
| $y(1)$        | First cell height                             | +                                  | value in wall scaling           |

295 *Author contributions.* K.Y. simulated the cases and wrote the article. H.K. and K.Y. implemented methods in OpenFOAM. T.K. provided experimental data and consultation regarding experimental results. B.S. coordinated project. B.S. and J.P. provided consultation and supervision.

*Competing interests.* The authors declare no conflict of interest.

*Disclaimer.* TEXT

300 *Acknowledgements.* This work is part of project OptAnIce: Optimales Anti-Icing für Rotorblätter im kalten Klima, funded by the German Federal Ministry for Economic Affairs and Energy (BMWi), fund No.: 0324232C. The simulations were performed using the HPC Cluster EDDY in the University of Oldenburg, a part of WIMS-Cluster project and funded by the BMWi.

## References

- Achenbach, E.: The effect of surface roughness on the heat transfer from a circular cylinder to the cross flow of air, *International Journal of Heat and Mass Transfer*, 20, 359–369, 1977.
- 305 Aupoix, B. and Spalart, P.: Extensions of the Spalart–Allmaras turbulence model to account for wall roughness, *International Journal of Heat and Fluid Flow*, 24, 454–462, 2003.
- Blanchard, A.: *Analyse expérimentale et théorique de la structure de la turbulence d’une couche limite sur paroi rugueuse*, 1977.
- Cebeci, T.: *Analysis of Turbulent Flows with Computer Programs*, Elsevier, 2004.
- 310 Chedevergne, F. and Aupoix, B.: Accounting for wall roughness effects in turbulence models: a wall function approach, in: 7th EUCASS conference, 2017.
- Chen, H. and Patel, V.: Near-wall turbulence models for complex flows including separation, *AIAA journal*, 26, 641–648, 1988.
- Da Silva, G. A. L., Arima, M. N., Branco, N. N., and de Mattos Pimenta, M.: Proposed Wall Function Models for Heat Transfer around a Cylinder with Rough Surface in Cross Flow, Tech. rep., SAE Technical Paper, 2011.
- 315 DIN, E.: 4287: Geometrische Produktspezifikation (GPS)–Oberflächenbeschaffenheit: Tastschnittverfahren–Benennungen, Definitionen und Kenngrößen der Oberflächenbeschaffenheit, Beuth-Verlag, Berlin, 2010.
- Dirling, JR, R.: A method for computing rough wall heat transfer rates on reentry nose tips, in: 8th Thermophysics Conference, p. 763, 1973.
- Greenshields, C. J.: *OpenFoam user guide. Version 6*, OpenFOAM Foundation Ltd July, 2017.
- Hawkins, D. M., Shannon, T. A., and McClain, S. T.: Convection from Surfaces with Real Laser-Scanned Ice Accretion Roughness and Different Thermal Conductivities, in: 9th AIAA Atmospheric and Space Environments Conference, p. 3579, 2017.
- 320 Hellsten, A. and Laine, S.: Extension of the k-omega-SST turbulence model for flows over rough surfaces, in: 22nd Atmospheric Flight Mechanics Conference, p. 3577, 1997.
- Hosni, M., Coleman, H. W., and Taylor, R. P.: Measurements and calculations of rough-wall heat transfer in the turbulent boundary layer, *International Journal of Heat and Mass Transfer*, 34, 1067–1082, 1991.
- 325 Hosni, M., Coleman, H. W., Garner, J. W., and Taylor, R. P.: Roughness element shape effects on heat transfer and skin friction in rough-wall turbulent boundary layers, *International Journal of Heat and Mass Transfer*, 36, 147–153, 1993.
- Knopp, T., Eisfeld, B., and Calvo, J. B.: A new extension for k- $\omega$  turbulence models to account for wall roughness, *International Journal of Heat and Fluid Flow*, 30, 54–65, 2009.
- Liu, X.: New near-wall treatment for suspended sediment transport simulations with high Reynolds number turbulence models, *Journal of Hydraulic Engineering*, 140, 333–339, 2014.
- 330 McClain, S. T., Vargas, M. M., Tsao, J.-C., and Broeren, A. P.: Ice Roughness and Thickness Evolution on a Business Jet Airfoil, in: 2018 Atmospheric and Space Environments Conference, p. 3014, 2018.
- Menter, F.: Two-equation eddy-viscosity turbulence models for engineering applications, *AIAA journal*, 32, 1598–1605, 1994.
- Moody, L. F.: Friction factors for pipe flow, *Trans. Asme*, 66, 671–684, 1944.
- 335 Nikuradse, J.: *Strömungsgesetze in rauhen Röhren VDI-Forschungsheft*, Bd. 361, 1933.
- Sailor, D. J., Smith, M., and Hart, M.: Climate change implications for wind power resources in the Northwest United States, *Renewable Energy*, 33, 2393–2406, 2008.
- Schlichting, H.: *Experimental investigation of the problem of surface roughness*, 1937.
- Spalart, P. and Allmaras, S.: A one-equation turbulence model for aerodynamic flows, p. 439, 1992.

- 340 Suga, K., Craft, T., and Iacovides, H.: An analytical wall-function for turbulent flows and heat transfer over rough walls, *International Journal of Heat and Fluid Flow*, 27, 852–866, 2006.
- Versteeg, H. K. and Malalasekera, W.: *An introduction to computational fluid dynamics: the finite volume method*, Pearson education, 2007.
- Wang, Z. and Zhu, C.: Numerical simulation for in-cloud icing of three-dimensional wind turbine blades, *Simulation*, 94, 31–41, 2018.
- Wilcox, D. C. et al.: *Turbulence modeling for CFD*, vol. 3, DCW industries La Canada, CA, 2006.
